# Supplementary material for: Epigenetic Drifts during Long-Term Intestinal Organoid Culture
Source: MDPI journal article supplement (doi:10.3390/cells10071718), 2021-07-07
Supplement: s1 [file s1]

Supplement 1: Organoid culture induces the ‘genomic stress’ profile.

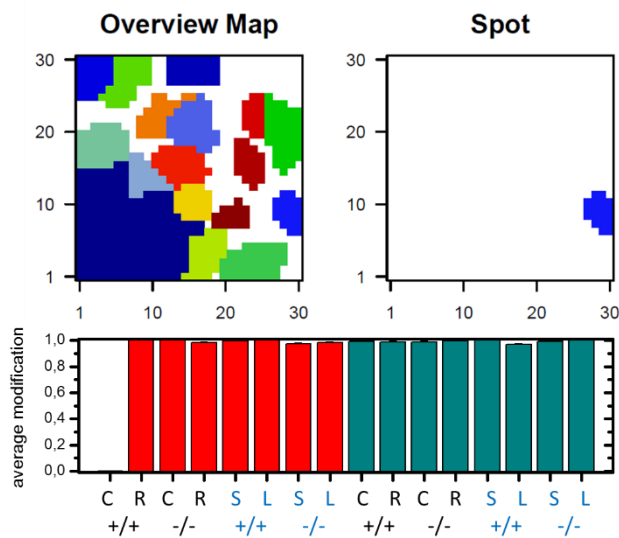

**Figure S1: Recruitment of H3K4me3 to H3K27me3 targets.** The recruitment was previously described in intestinal tissue under genomic stress [13]. Here, the same recruitment is seen in 254 genes of all organoid samples (>80% of the set seen in stressed tissue alone).

**Hypothesis:** This suggests that a similar epigenetic stress response is seen under genomic and culture-induced stress.

Supplement 2: Similar gene activation in long-term organoids and irradiated tissue

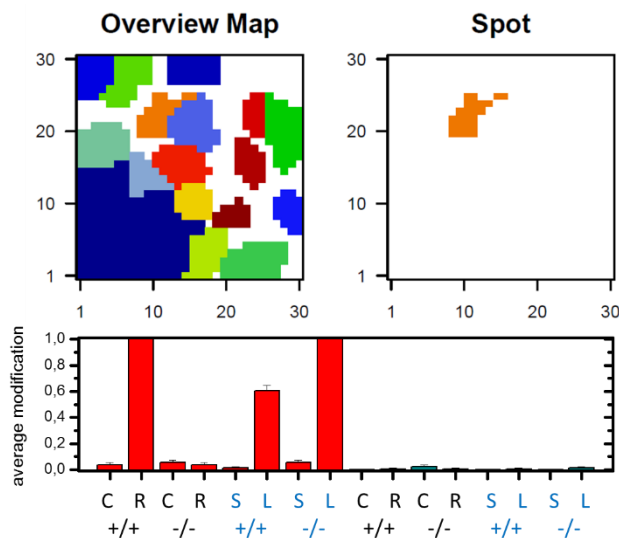

**Figure S2. Recruitment of H3K4me3 to unmodified genes.** While cluster **h** genes recruit H3K4me3 to previously unmodified genes exclusively in long-term organoid culture, another set of 126 genes recruits this modification to unmodified genes in long-term organoid culture and, in addition, in irradiated tissue of *Msh2*<sup>+/+</sup> mice.

**Hypothesis:** This gives rise to the idea that recruitment of this activating mark represents a stress response also in cluster **h** genes.

Supplement 3: Long-term culture induces bivalency

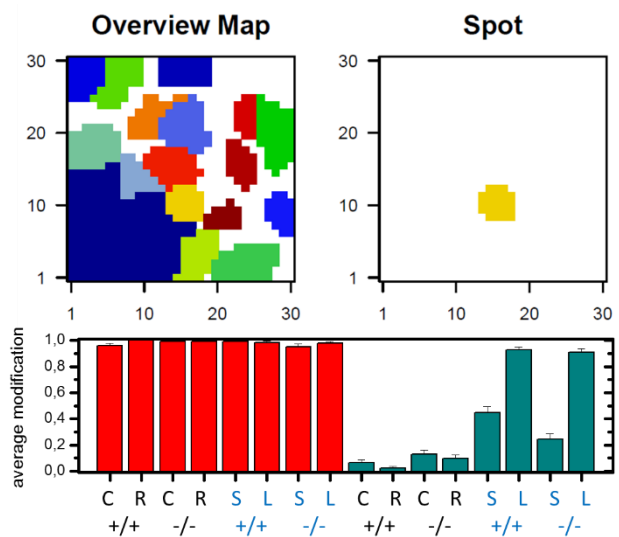

**Figure S3: Long-term culture-induced recruitment of H3K27me3 to H3K4me3 targets.** Although bivalency is lost at many genes in either short-term (cluster **f**) or long-term culture (cluster **g**), there are 121 genes that acquire this kind of modification state during long-term culture.

**Hypothesis:** Ongoing maturation of the epithelium is accompanied by progressive epigenetic silencing of developmental genes by H3K27me3.

**A**

cluster g

average modification

H3K4me3

H3K27me3

ISC aEC

cluster h

H3K4me3

H3K27me3

ISC aEC

**B**

average promoter methylation

e12 e14 ISC aEC

**C**

cluster g

Density

GC content (%)

Set

Genomes

List

$P = 8.4E-09$  \*\*\*

cluster h

Density

GC content (%)

Set

Genomes

List

$P = 0.8$

[illegible]

**Figure S5. Genes epigenetically activated in long-term organoid culture show diverse transcriptional behavior.** A, B) Gene distribution in the SOM. Genes of cluster **g** (A) and cluster **h** (B) do not accumulate in cluster **n**. Gene positions are indicated by colored dots. C, D) Heatmaps of gene transcription. Cluster **g** (C) and cluster **h** genes (D) are preferentially activated in G2 and G3, respectively. Shown are the 20 most strongly regulated genes, ranked according to their transcription in these groups.

Supplement 5: Transcriptional changes of selected gene sets during long-term organoid culture

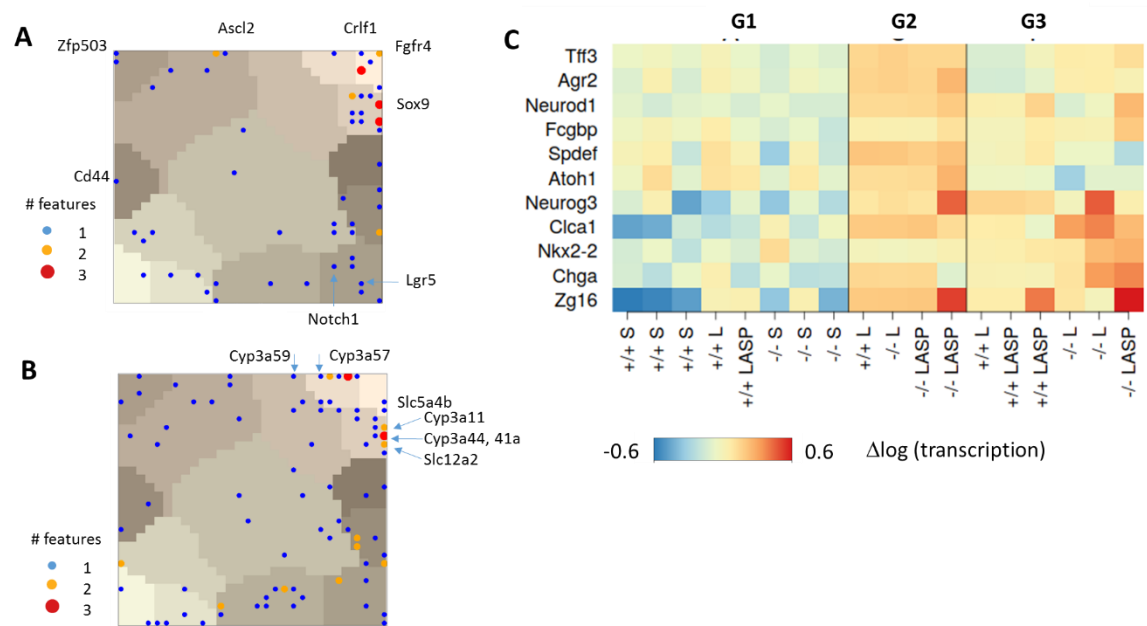

**Figure S6: Details on the maturation and adaptation process in long-term organoid culture.** A, B) SOM distribution of selected gene sets upregulated in long-term culture. Individual genes are represented by colored dots. Selected genes are labelled. A) Marker set I of *Lgr5*-high expressing cells (*Lgr5*-high). B) Marker set II of genes activated during long-term culture of fetal tissue-derived organoids (FLTC-high). The gene sets are largely disjunct. They overlap in 7 genes only, among them is *Lgr5*. C) Heatmap of the transcription of secretory marker genes that become activated in long-term organoid culture and colonic monolayer culture [33].

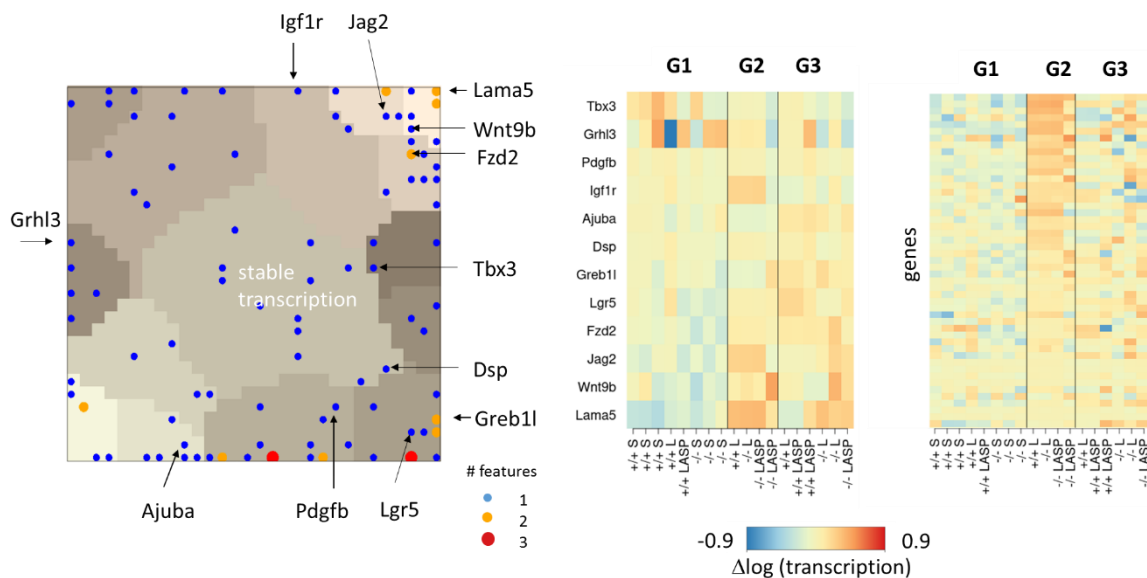

**Figure S7: Genes epigenetically activated in short-term organoid culture show diverse transcriptional behaviors.** A) Genes that become epigenetically activated in short-term culture by loss of H3K27me3 spread throughout the RNA-SOM (position indicated by colored dots). Genes of the clusters **f** that contribute to the GO set 'morphogenesis of an epithelium' are indicated. B) Heatmap of the transcription of cluster **f** genes contributing to the GO set. C) Heatmap of cluster **f** genes that are activated in G2. They are ranked according to their transcription in this group. Shown are rank 1-50.

### **Additional references**

[49] Ge SX, Jung D, Yao R. ShinyGO: a graphical gene-set enrichment tool for animals and plants. *Bioinformatics*. 2020; 36(8):2628-2629.
